# Supplementary figures and images for: Label-free in vitro visualization of particle uptake into human oral buccal epithelial cells by confocal Raman microscopy
Source: Royal Society of Chemistry journal article supplement (doi:10.1039/c4an00371c), 2014-08-19

**Supplemental material**

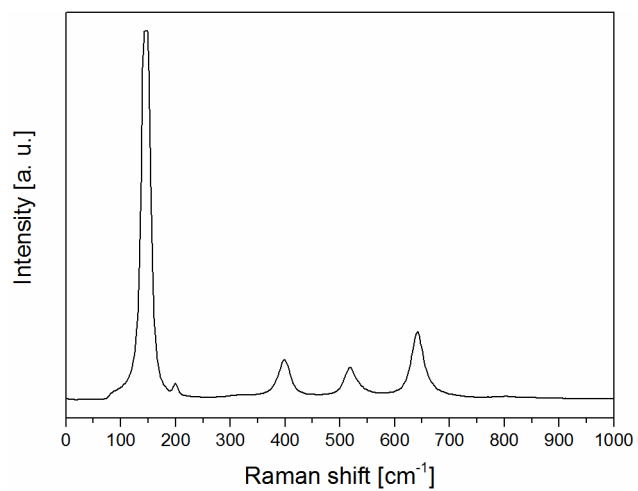

**Suppl. Figure.** Raman spectrum of titanium dioxide NM100 (TIONA) raw material.

Supplement: c4an00371c1.pdf [file c4an00371c1.pdf]
